# Supplementary material
Source: PubMed Central journal article supplement (PMC7361565)
Supplement: ACEM-27-700-s001.pdf [file ACEM-27-700-s001.pdf]

## Data Supplement S1. Supplemental material.

**Table S1. Stratification for key response questions**

| Characteristics                      | Effect of pandemic on workplace stress: median (IQR) | Effect of pandemic on home stress: median (IQR) | Pre-pandemic emotionally exhaustion and burnout: median (IQR) | Post-pandemic emotionally exhaustion and burnout: median (IQR) | Changed behavior with friends and family because of possible excess work exposure: n (%) |            |
|--------------------------------------|------------------------------------------------------|-------------------------------------------------|---------------------------------------------------------------|----------------------------------------------------------------|------------------------------------------------------------------------------------------|------------|
| Female (n = 192)                     | 6 (5,6)                                              | 6 (5,7)                                         | 3 (2,4)                                                       | 4 (3,6)                                                        | Yes                                                                                      | 174 (90.6) |
|                                      |                                                      |                                                 |                                                               |                                                                | No                                                                                       | 13 (7.8)   |
|                                      |                                                      |                                                 |                                                               |                                                                | Unsure                                                                                   | 3 (1.6)    |
| Male (n = 229)                       | 5 (4,6)                                              | 5 (4,6)                                         | 2 (2,4)                                                       | 4 (3,6)                                                        | Yes                                                                                      | 209 (91.3) |
|                                      |                                                      |                                                 |                                                               |                                                                | No                                                                                       | 17 (74.2)  |
|                                      |                                                      |                                                 |                                                               |                                                                | Unsure                                                                                   | 2 (0.9)    |
| Faculty (n = 236)                    | 5 (4,6)                                              | 5 (4,6)                                         | 3 (2,4)                                                       | 5 (3,6)                                                        | Yes                                                                                      | 210 (89)   |
|                                      |                                                      |                                                 |                                                               |                                                                | No                                                                                       | 21 (8.9)   |
|                                      |                                                      |                                                 |                                                               |                                                                | Unsure                                                                                   | 3 (1.3)    |
| Resident or fellow (n = 187)         | 5 (4,6)                                              | 5 (4,6)                                         | 3 (2,4)                                                       | 4 (3,6)                                                        | Yes                                                                                      | 175 (93.6) |
|                                      |                                                      |                                                 |                                                               |                                                                | No                                                                                       | 9 (4.8)    |
|                                      |                                                      |                                                 |                                                               |                                                                | Unsure                                                                                   | 2 (1.1)    |
| Have children < 18 in home (n = 166) | 5 (4,6)                                              | 5 (4,6)                                         | 3 (2,4)                                                       | 4 (3,6)                                                        | Yes                                                                                      | 149 (89.8) |
|                                      |                                                      |                                                 |                                                               |                                                                | No                                                                                       | 13 (7.8)   |
|                                      |                                                      |                                                 |                                                               |                                                                | Unsure                                                                                   | 2 (1.2)    |
| No children in home (n = 259)        | 5 (4,6)                                              | 5 (4,6)                                         | 3 (2,4)                                                       | 4 (3,6)                                                        | Yes                                                                                      | 238 (91.9) |
|                                      |                                                      |                                                 |                                                               |                                                                | No                                                                                       | 18 (6.9)   |
|                                      |                                                      |                                                 |                                                               |                                                                | Unsure                                                                                   | 3 (1.2)    |
| California sites (n = 306)           | 5 (4,6)                                              | 5 (4,6)                                         | 3 (2,4)                                                       | 4 (3,6)                                                        | Yes                                                                                      | 279 (91.2) |
|                                      |                                                      |                                                 |                                                               |                                                                | No                                                                                       | 7 (2.3)    |
|                                      |                                                      |                                                 |                                                               |                                                                | Unsure                                                                                   | 1 (0.3)    |
| Non-California sites (n = 120)       | 5 (4,6)                                              | 5 (4,6)                                         | 3 (2,4)                                                       | 4 (3,6)                                                        | Yes                                                                                      | 109 (90.8) |
|                                      |                                                      |                                                 |                                                               |                                                                | No                                                                                       | 7 (5.8)    |
|                                      |                                                      |                                                 |                                                               |                                                                | Unsure                                                                                   | 1 (0.8)    |

IQR = interquartile range

**An Assessment of Anxiety Levels and Stressors in Health Care Providers during the COVID 19 Pandemic**

1. Age: \_\_\_\_\_ Decline to answer \_\_\_\_\_

2. What is your gender? (check one)

- Male
- Female
- Trans Male
- Trans Female
- Genderqueer/Gender Non- binary
- Decline to answer

3. What is your race/ethnicity? (check all that apply)

- African-American
- Asian
- Hispanic/Latinx
- Native American /American Indian
- Native Hawaiian or Pacific Islander
- White (non-Latinx)
- Other \_\_\_\_\_
- Decline to answer

4. Do you have anyone living with you at your home? (Check all that apply)

- Live alone
- Roommate(s)
- My partner(s)
- Children < 18 y o
- Parent or Parents
- Friends
- Someone over the age of 70
- Decline to answer

5. What is your primary specialty? **\*We used this instrument as part of a separate quality improvement project at 3 of the sites and hence gathered information on broader groups of physicians for this project**

- Anesthesia
- Emergency Medicine
- Family Medicine
- General Surgery
- Internal Medicine
- Neurology
- Obstetrics/Gynecology
- Pediatrics
- Psychiatry
- Radiology
- Surgical subspecialty
- Other \_\_\_\_\_
- Decline to answer

6. What is your faculty position or level of training?

- Resident physician
  - PGY \_\_\_\_\_
- Fellow
- Faculty full-time
- Faculty part-time or per diem

7. Have you had direct patient care/contact at work since February 15? Yes \_\_\_\_\_ No \_\_\_\_\_ (if no, skip to 15)

8. What is your primary institutional affiliation?

- UCSF
- UCLA (all campuses including Reagan, Harbor, Olive View, VA, and Bakersfield)
- UCSD (all campuses)
- Cooper Medical School of Rowan University
- LSU Health Science Center
- Other \_\_\_\_\_

9. At which of these settings have you had patient contact? Check all

- Outpatient clinic
- Emergency department
- Inpatient hospital (non-ICU)
- Intensive Care Unit
- Invasive procedure suite (e.g. cath lab)
- Other \_\_\_\_\_

10. Approximately how many days have you had patient contact since February 15? \_\_\_\_\_

11. Have you suspected COVID-19 virus infection in any of the patients that you have seen since February 15?

Yes \_\_\_\_ No \_\_\_\_ (if no, skip to question 15)

12. How many patients have you suspected of having COVID-19? \_\_\_\_\_

13. What % of these patients that you suspected of having COVID-19 received the swab test for COVID-19?

(by this we mean the test specifically for COVID – not the tests for other pathogens) \_\_\_\_\_ (0-100%)

14. Did any of these patients test + for COVID-19 (via swab test)?  Yes  No  Unsure

15. How much has the COVID-19 pandemic affected your stress or anxiety levels in the workplace (circle one)?

|            |   |   |          |   |   |           |
|------------|---|---|----------|---|---|-----------|
| 1          | 2 | 3 | 4        | 5 | 6 | 7         |
| Not at all |   |   | Somewhat |   |   | Extremely |

16. To what extent are you experiencing the following worries/concerns? Provide a number for each statement using the 1-7 scale below:

|            |   |   |          |   |   |           |
|------------|---|---|----------|---|---|-----------|
| 1          | 2 | 3 | 4        | 5 | 6 | 7         |
| Not at all |   |   | Somewhat |   |   | Extremely |

- a) I worry that I am being exposed at work and compromising my health \_\_\_\_\_
- b) I worry that our ED, clinic, or hospital is not prepared enough for the pandemic \_\_\_\_\_

- c) I worry that we will not have enough staffing as co-workers are quarantined \_\_\_\_\_
- d) I worry that the personal protective equipment (PPE) is inadequate \_\_\_\_\_
- e) I worry about the well-being of co-workers who have been diagnosed with COVID \_\_\_\_\_
- f) I worry that we are not able to accurately diagnose COVID-19 cases quickly \_\_\_\_\_
- g) I worry that we are having to send patients home without a clear diagnosis \_\_\_\_\_
- h) I worry that patients with unclear diagnoses are exposing others in the community \_\_\_\_\_
- i) I worry that I might have to undergo quarantine and will not be able to work \_\_\_\_\_

18. How much has the COVID-19 pandemic affected your stress or anxiety levels **at home (outside of work)**?

|            |   |   |          |   |   |           |
|------------|---|---|----------|---|---|-----------|
| 1          | 2 | 3 | 4        | 5 | 6 | 7         |
| Not at all |   |   | Somewhat |   |   | Extremely |

19. To what extent are you experiencing the following worries and concerns about COVID-19 **at home**?  
Provide a number for each statement using the 1-7 scale below:

|            |   |   |          |   |   |           |
|------------|---|---|----------|---|---|-----------|
| 1          | 2 | 3 | 4        | 5 | 6 | 7         |
| Not at all |   |   | Somewhat |   |   | Extremely |

- a) I worry that I may be secondarily exposing family members or others because of my work \_\_\_\_\_
- b) I worry that others at home or elsewhere are afraid to come in contact with me because I'm a health care provider \_\_\_\_\_
- c) I worry that I may have to quarantine at home and this will affect my family \_\_\_\_\_
- d) I worry about social isolation and not being able to do things outside of the home \_\_\_\_\_
- e) I worry that I will not be able to get food and other necessities for me and my household \_\_\_\_\_
- f) I worry that my home life will not be the same after resolution of this pandemic \_\_\_\_\_

20. Have you changed your behavior with friends and family **as a result of your possible excess exposure as a healthcare worker** during the pandemic?  Yes  No  Unsure

21. If yes, what have you done?

- I have decreased my signs of affection (hugging, kissing) with romantic partner(s)
- I have decreased my signs of affection (hugging, kissing) with my family and friends
- I have decreased my activities like food preparation for family and friends
- I have decreased dependent care that involves my direct contact
- I wear gloves or a mask around the home
- I have discussed risks of my potential exposure as a health care worker with family and friends

22. Have you wanted to be tested for COVID-19?  Yes  No  Unsure

23. Considering your answer to question 22 above, check all that apply

- I have had mild symptoms that could be COVID-19
- I would like to be able to tell my family and friends that I have been tested
- I believe that all health care workers should be screened/tested
- It would help me prepare for the next weeks to months

- My friends and family have requested this
- It would help relieve my anxiety/stress
- I don't want to know if I have COVID-19
- Other \_\_\_\_\_

25. How much do you believe that your friends and family are treating you differently **as a result of your work and potential exposure to COVID-19?**

|            |   |   |          |   |   |           |
|------------|---|---|----------|---|---|-----------|
| 1          | 2 | 3 | 4        | 5 | 6 | 7         |
| Not at all |   |   | Somewhat |   |   | Extremely |

26. If you believe that your friends and family are treating you differently, how? (check all that apply)

- They are showing less affection towards me
- They are reluctant to be in close contact with me
- They have avoided activities with me that they used to do
- They have expressed concerns about my health
- They have expressed concerns about their potential exposure because of me
- Other \_\_\_\_\_

27. From the list below, pick the top 5 measures (1 = highest priority) that you think would alleviate some of your anxiety/stress related to the COVID-19 pandemic:

- \_\_\_ Testing for COVID-19 for patients at my discretion (instead of as limited by current protocols)
- \_\_\_ Rapid turnaround (< 6 hours) testing
- \_\_\_ Ability to request testing of myself for COVID-19 – even if I do not have symptoms
- \_\_\_ Easily available mental health consultations
- \_\_\_ Enhanced availability of personal protection equipment
- \_\_\_ Clearer communication about changes in protocols
- \_\_\_ Assurances that my (and my dependents’) medical care will be covered by my employer
- \_\_\_ Assurances that I can take leave to care for myself and family members
- \_\_\_ Assurances about disability benefits
- \_\_\_ Greater clarity regarding my risk for exposure
- \_\_\_ Departmental ZOOM or other video sessions to discuss COVID-19 response and changes

29. **Before** the COVID-19 pandemic, to what extent were you experiencing severe, ongoing job stress where you felt emotionally exhausted, burned out, cynical about your work and fatigued, even when you wake up?

|            |   |   |          |   |   |           |
|------------|---|---|----------|---|---|-----------|
| 1          | 2 | 3 | 4        | 5 | 6 | 7         |
| Not at all |   |   | Somewhat |   |   | Very much |

30. **Since the pandemic started**, to what extent are you experiencing severe, ongoing job stress where you feel emotionally exhausted, burned out, cynical about your work, and fatigued even when you wake up?

|            |   |   |          |   |   |           |
|------------|---|---|----------|---|---|-----------|
| 1          | 2 | 3 | 4        | 5 | 6 | 7         |
| Not at all |   |   | Somewhat |   |   | Very much |

31. The following questions are to understand possible changes in your sleep **related to the COVID-19 pandemic:**

- a) How much sleep have you gotten per night, on average, this week? \_\_\_\_\_ (# of hours)
- b) How much trouble have you had falling asleep or staying asleep over the past week?

|                      |   |   |                 |   |   |                    |
|----------------------|---|---|-----------------|---|---|--------------------|
| 1                    | 2 | 3 | 4               | 5 | 6 | 7                  |
| No trouble<br>at all |   |   | Some<br>trouble |   |   | Extreme<br>trouble |

- c) How rested have you felt upon awakening, on average, this week?

|                      |   |   |                    |   |   |                   |
|----------------------|---|---|--------------------|---|---|-------------------|
| 1                    | 2 | 3 | 4                  | 5 | 6 | 7                 |
| Not at all<br>rested |   |   | Somewhat<br>rested |   |   | Fully rest-<br>ed |

**32. Since the start of the COVID-19 pandemic, have you**

- a) had nightmares related to the pandemic or thought about the pandemic when you did not want to?  Yes  No
- b) tried hard not to think about the pandemic or gone out of your way to avoid situations that reminded you of it?  Yes  No
- c) been constantly on guard, watchful, or easily started?  Yes  No
- d) felt numb or detached from people, activities or your surroundings?  Yes  No
- e) felt guilty or unable to stop blaming yourself or others for the effects of the pandemic or any problems the pandemic may have caused?  Yes  No
